# Supplementary material
Source: PubMed Central journal article supplement (PMC8825746)
Supplement: NIHMS1756311-supplement-Supplemental_Tables.pdf [file NIHMS1756311-supplement-Supplemental_Tables.pdf]

| <b>Supplemental Table 1. Univariate Analysis of Engraftment, Relapse and Non-Relapse Mortality</b> |                      |          |                               |                   |              |                     |                   |              |                              |                   |                  |
|----------------------------------------------------------------------------------------------------|----------------------|----------|-------------------------------|-------------------|--------------|---------------------|-------------------|--------------|------------------------------|-------------------|------------------|
|                                                                                                    |                      |          | <b>Neutrophil Engraftment</b> |                   |              | <b>Relapse</b>      |                   |              | <b>Non-Relapse Mortality</b> |                   |                  |
|                                                                                                    |                      | <b>N</b> | <b>28-day (95%CI)</b>         | <b>HR (95%CI)</b> | <b>P</b>     | <b>1 Yr (95%CI)</b> | <b>HR (95%CI)</b> | <b>P</b>     | <b>100-day (95%CI)</b>       | <b>HR (95%CI)</b> | <b>P</b>         |
| <b>Age</b>                                                                                         | <60                  | 144      | 0.944(0.890,0.972)            | Reference         | <b>0.032</b> | 0.182(0.124,0.250)  | Reference         | 0.74         | 0.035(0.013,0.074)           | Reference         | <b>&lt;0.001</b> |
|                                                                                                    | ≥60                  | 66       | 0.894(0.784,0.950)            | 0.71(0.55,0.92)   |              | 0.216(0.124,0.323)  | 0.92(0.51,1.63)   |              | 0.167(0.088,0.266)           | 3.15(1.79,5.54)   |                  |
| <b>Sex</b>                                                                                         | M                    | 122      | 0.943(0.880,0.973)            | Reference         | 0.96         | 0.243(0.170,0.324)  | Reference         | 0.11         | 0.049(0.020,0.098)           | Reference         | 0.19             |
|                                                                                                    | F                    | 88       | 0.909(0.823,0.954)            | 0.99(0.76,1.29)   |              | 0.125(0.066,0.204)  | 0.62(0.35,1.11)   |              | 0.114(0.058,0.190)           | 1.45(0.83,2.55)   |                  |
| <b>Female donor to male recipient</b>                                                              | No                   | 176      | 0.926(0.875,0.957)            | Reference         | 0.90         | 0.185(0.131,0.246)  | Reference         | 0.57         | 0.085(0.050,0.132)           | Reference         | 0.73             |
|                                                                                                    | Yes                  | 34       | 0.941(0.738,0.988)            | 1.02(0.75,1.38)   |              | 0.235(0.109,0.389)  | 1.22(0.63,2.36)   |              | 0.029(0.002,0.132)           | 0.86(0.39,1.89)   |                  |
| <b>Disease Risk Index</b>                                                                          | Low                  | 31       | 0.968(0.663,0.997)            | Reference         | 0.12         | 0.161(0.057,0.312)  | Reference         | 0.077        | 0.0 (no events)              | Reference         | 0.094            |
|                                                                                                    | Intermediate         | 81       | 0.901(0.808,0.951)            | 0.70(0.49,1.01)   |              | 0.164(0.092,0.254)  | 1.61(0.57,4.53)   |              | 0.099(0.046,0.176)           | 3.29(0.99,10.98)  |                  |
|                                                                                                    | High/Very high       | 78       | 0.936(0.846,0.974)            | 0.83(0.58,1.19)   |              | 0.286(0.189,0.390)  | 2.56(0.94,7.00)   |              | 0.103(0.048,0.182)           | 3.24(0.97,10.84)  |                  |
| <b>Conditioning regimen</b>                                                                        | MAC-TBI              | 71       | 0.930(0.832,0.971)            | Reference         | <b>0.016</b> | 0.185(0.104,0.285)  | Reference         | 0.35         | 0.056(0.018,0.127)           | Reference         | 0.10             |
|                                                                                                    | MAC-Non- TBI         | 18       | 0.944(0.485,0.996)            | 0.83(0.52,1.31)   |              | 0.118(0.018,0.320)  | 0.36(0.09,1.54)   |              | 0.0 (no events)              | 0.61(0.14,2.68)   |                  |
|                                                                                                    | RIC/NMA              | 121      | 0.926(0.860,0.961)            | 0.67(0.49,0.92)   |              | 0.209(0.141,0.286)  | 0.90(0.51,1.59)   |              | 0.099(0.054,0.160)           | 1.75(0.91,3.37)   |                  |
| <b>Donor type</b>                                                                                  | Haploidentical       | 172      | 0.936(0.886,0.964)            | Reference         | 0.30         | 0.219(0.160,0.285)  | Reference         | <b>0.028</b> | 0.076(0.042,0.121)           | Reference         | 0.21             |
|                                                                                                    | Mismatched unrelated | 38       | 0.895(0.727,0.962)            | 1.20(0.82,1.76)   |              | 0.079(0.020,0.193)  | 0.28(0.09,0.92)   |              | 0.079(0.020,0.193)           | 1.53(0.78,2.97)   |                  |
| <b>ABO blood group compatibility</b>                                                               | ABO Compatible       | 139      | 0.921(0.860,0.956)            | Reference         | 0.097        | 0.206(0.142,0.278)  | Reference         | 0.71         | 0.094(0.052,0.149)           | Reference         | 0.24             |
|                                                                                                    | Minor                | 32       | NE                            | 1.40(0.97,2.01)   |              | 0.219(0.095,0.375)  | 1.05(0.52,2.15)   |              | 0.031(0.002,0.140)           | 0.33(0.10,1.06)   |                  |
|                                                                                                    | Major                | 24       | 0.958(0.592,0.997)            | 1.03(0.74,1.44)   |              | 0.128(0.031,0.297)  | 0.59(0.21,1.63)   |              | 0.0 (no events)              | 0.96(0.41,2.23)   |                  |
|                                                                                                    | Bidirectional        | 15       | 0.867(0.483,0.972)            | 1.02(0.59,1.75)   |              | 0.133(0.019,0.357)  | 0.74(0.23,2.33)   |              | 0.133(0.020,0.354)           | 1.14(0.39,3.38)   |                  |
| <b>Donor CMV serostatus</b>                                                                        | D+                   | 143      | 0.930(0.872,0.962)            | Reference         | 0.40         | 0.184(0.125,0.252)  | Reference         | 0.80         | 0.098(0.056,0.153)           | Reference         | 0.22             |
|                                                                                                    | D-                   | 67       | 0.925(0.822,0.970)            | 1.11(0.84,1.47)   |              | 0.213(0.123,0.320)  | 1.07(0.60,1.90)   |              | 0.030(0.006,0.093)           | 0.66(0.35,1.25)   |                  |
| <b>Recipient CMV serostatus</b>                                                                    | R+                   | 177      | 0.938(0.889,0.965)            | Reference         | 0.63         | 0.194(0.139,0.255)  | Reference         | 0.65         | 0.085(0.050,0.132)           | Reference         | 0.18             |
|                                                                                                    | R-                   | 33       | 0.879(0.690,0.956)            | 1.09(0.71,1.67)   |              | 0.195(0.077,0.352)  | 0.80(0.35,1.85)   |              | 0.030(0.002,0.136)           | 0.50(0.18,1.38)   |                  |

| <b>Supplemental Table 1. Univariate Analysis of Engraftment, Relapse and Non-Relapse Mortality</b> |                             |                               |                       |                   |          |                     |                   |              |                              |                   |          |
|----------------------------------------------------------------------------------------------------|-----------------------------|-------------------------------|-----------------------|-------------------|----------|---------------------|-------------------|--------------|------------------------------|-------------------|----------|
|                                                                                                    |                             | <b>Neutrophil Engraftment</b> |                       |                   |          | <b>Relapse</b>      |                   |              | <b>Non-Relapse Mortality</b> |                   |          |
|                                                                                                    |                             | <b>N</b>                      | <b>28-day (95%CI)</b> | <b>HR (95%CI)</b> | <b>P</b> | <b>1 Yr (95%CI)</b> | <b>HR (95%CI)</b> | <b>P</b>     | <b>100-day (95%CI)</b>       | <b>HR (95%CI)</b> | <b>P</b> |
| <b>Graft source</b>                                                                                | Peripheral blood stem cells | 166                           | 0.928(0.875,0.959)    | Reference         | 0.26     | 0.165(0.113,0.226)  | Reference         | <b>0.038</b> | 0.090(0.053,0.140)           | Reference         | 0.18     |
|                                                                                                    | Bone marrow                 | 44                            | 0.932(0.784,0.980)    | 0.81(0.62,1.05)   |          | 0.301(0.171,0.443)  | 1.89(1.05,3.40)   |              | 0.023(0.002,0.105)           | 0.59(0.27,1.30)   |          |
| <b>Karnofsky Performance Status, %</b>                                                             | ≥80                         | 176                           | 0.926(0.875,0.957)    | Reference         | 0.84     | 0.191(0.136,0.253)  | Reference         | 0.89         | 0.080(0.046,0.126)           | Reference         | 0.074    |
|                                                                                                    | <80                         | 34                            |                       | 0.94(0.68,1.32)   |          | 0.206(0.089,0.357)  | 1.06(0.52,2.16)   |              | 0.059(0.010,0.174)           | 1.83(0.96,3.50)   |          |
| <b>HCT-Comorbidity Index</b>                                                                       | 0-2                         | 125                           | 0.952(0.893,0.979)    | Reference         | 0.10     | 0.195(0.130,0.270)  | Reference         | 0.40         | 0.056(0.025,0.106)           | Reference         | 0.18     |
|                                                                                                    | ≥3                          | 85                            | 0.894(0.803,0.945)    | 0.80(0.62,1.03)   |          | 0.191(0.115,0.282)  | 1.24(0.72,2.14)   |              | 0.106(0.052,0.182)           | 1.46(0.83,2.56)   |          |
| <b>Tacrolimus initial dosing method</b>                                                            | Flat                        | 131                           | 0.931(0.870,0.964)    | Reference         | 0.71     | 0.170(0.111,0.239)  | Reference         | 0.54         | 0.084(0.044,0.139)           | Reference         | 0.50     |
|                                                                                                    | Weight-based                | 79                            | 0.924(0.833,0.966)    | 1.05(0.81,1.37)   |          | 0.234(0.146,0.334)  | 1.18(0.68,2.06)   |              | 0.063(0.023,0.132)           | 1.22(0.69,2.17)   |          |
| <b>Tacrolimus at initial steady state, ng/mL</b>                                                   | <10                         | 176                           | 0.938(0.889,0.965)    | Reference         | 0.24     | 0.173(0.120,0.233)  | Reference         | <b>0.031</b> | 0.080(0.046,0.126)           | Reference         | 0.79     |
|                                                                                                    | ≥10                         | 34                            | 0.882(0.702,0.957)    | 0.79(0.55,1.15)   |          | 0.305(0.156,0.468)  | 1.98(1.07,3.65)   |              | 0.059(0.010,0.174)           | 0.90(0.40,2.01)   |          |

| Supplemental Table 2. Univariate Analysis of Survival Outcomes |                      |     |                    |                 |        |                                  |                 |       |                       |                 |        |
|----------------------------------------------------------------|----------------------|-----|--------------------|-----------------|--------|----------------------------------|-----------------|-------|-----------------------|-----------------|--------|
|                                                                |                      |     | Overall Survival   |                 |        | GvHD-Free, Relapse-Free Survival |                 |       | Disease-Free Survival |                 |        |
|                                                                |                      | N   | 1 Yr (95%CI)       | HR (95%CI)      | P      | 1 Yr (95%CI)                     | HR (95%CI)      | P     | 1 Yr (95%CI)          | HR (95%CI)      | P      |
| Age                                                            | <60                  | 144 | 0.803(0.727,0.859) | Reference       | <0.001 | 0.556(0.470,0.634)               | Reference       | 0.039 | 0.705(0.622,0.773)    | Reference       | <0.001 |
|                                                                | ≥60                  | 66  | 0.589(0.460,0.696) | 2.22(1.44,3.43) |        | 0.374(0.258,0.489)               | 1.47(1.02,2.13) |       | 0.434(0.313,0.550)    | 1.98(1.33,2.96) |        |
| Sex                                                            | M                    | 122 | 0.749(0.661,0.818) | Reference       | 0.79   | 0.462(0.370,0.549)               | Reference       | 0.98  | 0.582(0.488,0.665)    | Reference       | 0.81   |
|                                                                | F                    | 88  | 0.715(0.609,0.798) | 1.06(0.69,1.63) |        | 0.545(0.436,0.642)               | 1.00(0.70,1.44) |       | 0.670(0.561,0.758)    | 0.95(0.64,1.42) |        |
| Female donor to male recipient                                 | No                   | 176 | 0.724(0.651,0.784) | Reference       | 0.56   | 0.511(0.434,0.582)               | Reference       | 0.88  | 0.626(0.549,0.693)    | Reference       | 0.94   |
|                                                                | Yes                  | 34  | 0.794(0.616,0.896) | 0.84(0.45,1.54) |        | 0.441(0.273,0.597)               | 1.04(0.65,1.66) |       | 0.588(0.406,0.732)    | 1.02(0.61,1.72) |        |
| Disease Risk Index                                             | Low                  | 31  | 0.839(0.655,0.929) | Reference       | 0.022  | 0.677(0.484,0.812)               | Reference       | 0.002 | 0.742(0.550,0.862)    | Reference       | 0.003  |
|                                                                | Intermediate         | 81  | 0.761(0.651,0.841) | 2.50(1.11,5.61) |        | 0.482(0.367,0.587)               | 2.72(1.38,5.35) |       | 0.635(0.519,0.731)    | 2.50(1.17,5.32) |        |
|                                                                | High/Very high       | 78  | 0.613(0.495,0.711) | 2.96(1.32,6.61) |        | 0.367(0.261,0.473)               | 3.15(1.61,6.18) |       | 0.470(0.356,0.576)    | 3.34(1.58,7.04) |        |
| Conditioning regimen                                           | MAC-TBI              | 71  | 0.757(0.638,0.841) | Reference       | 0.080  | 0.496(0.373,0.607)               | Reference       | 0.050 | 0.686(0.563,0.781)    | Reference       | 0.048  |
|                                                                | MAC-Non- TBI         | 18  | 0.882(0.606,0.969) | 0.41(0.12,1.35) |        | 0.708(0.435,0.867)               | 0.35(0.14,0.89) |       | 0.765(0.488,0.904)    | 0.42(0.15,1.18) |        |
|                                                                | RIC/NMA              | 121 | 0.701(0.610,0.774) | 1.31(0.81,2.10) |        | 0.468(0.377,0.554)               | 1.03(0.70,1.51) |       | 0.559(0.465,0.642)    | 1.29(0.84,1.98) |        |
| Donor type                                                     | Haploidentical       | 172 | 0.741(0.668,0.800) | Reference       | 0.67   | 0.491(0.413,0.564)               | Reference       | 0.76  | 0.605(0.527,0.674)    | Reference       | 0.46   |
|                                                                | Mismatched unrelated | 38  | 0.711(0.539,0.828) | 1.13(0.63,2.02) |        | 0.526(0.358,0.670)               | 0.93(0.56,1.53) |       | 0.684(0.511,0.807)    | 0.81(0.46,1.43) |        |
| ABO blood group compatibility                                  | ABO Compatible       | 139 | 0.707(0.623,0.776) | Reference       | 0.26   | 0.463(0.377,0.545)               | Reference       | 0.41  | 0.590(0.502,0.667)    | Reference       | 0.37   |
|                                                                | Minor                | 32  | 0.875(0.700,0.951) | 0.54(0.27,1.08) |        | 0.625(0.435,0.767)               | 0.63(0.36,1.09) |       | 0.719(0.529,0.843)    | 0.61(0.33,1.12) |        |
|                                                                | Major                | 24  | 0.708(0.484,0.849) | 0.76(0.36,1.58) |        | 0.497(0.287,0.676)               | 0.90(0.51,1.59) |       | 0.664(0.439,0.816)    | 0.73(0.37,1.41) |        |
|                                                                | Bidirectional        | 15  | 0.733(0.436,0.891) | 1.20(0.55,2.63) |        | 0.533(0.263,0.744)               | 0.85(0.41,1.75) |       | 0.600(0.318,0.797)    | 0.94(0.43,2.05) |        |
| Donor CMV serostatus                                           | D+                   | 143 | 0.718(0.637,0.785) | Reference       | 0.18   | 0.498(0.413,0.577)               | Reference       | 0.96  | 0.605(0.520,0.680)    | Reference       | 0.34   |
|                                                                | D-                   | 67  | 0.771(0.649,0.855) | 0.72(0.44,1.17) |        | 0.499(0.372,0.612)               | 0.99(0.67,1.45) |       | 0.649(0.520,0.751)    | 0.81(0.53,1.25) |        |
| Recipient CMV serostatus                                       | R+                   | 177 | 0.716(0.643,0.777) | Reference       | 0.35   | 0.482(0.406,0.553)               | Reference       | 0.21  | 0.602(0.526,0.670)    | Reference       | 0.14   |
|                                                                | R-                   | 33  | 0.839(0.655,0.930) | 0.72(0.36,1.44) |        | 0.587(0.396,0.737)               | 0.70(0.40,1.23) |       | 0.710(0.516,0.838)    | 0.61(0.32,1.18) |        |

| Supplemental Table 2. Univariate Analysis of Survival Outcomes |                             |                  |                    |                 |              |                                  |                 |       |                       |                 |       |
|----------------------------------------------------------------|-----------------------------|------------------|--------------------|-----------------|--------------|----------------------------------|-----------------|-------|-----------------------|-----------------|-------|
|                                                                |                             | Overall Survival |                    |                 |              | GvHD-Free, Relapse-Free Survival |                 |       | Disease-Free Survival |                 |       |
|                                                                |                             | N                | 1 Yr (95%CI)       | HR (95%CI)      | P            | 1 Yr (95%CI)                     | HR (95%CI)      | P     | 1 Yr (95%CI)          | HR (95%CI)      | P     |
| Graft source                                                   | Peripheral blood stem cells | 166              | 0.715(0.639,0.777) | Reference       | 0.59         | 0.482(0.403,0.556)               | Reference       | 0.25  | 0.629(0.550,0.698)    | Reference       | 0.56  |
|                                                                | Bone marrow                 | 44               | 0.815(0.664,0.903) | 0.87(0.51,1.47) |              | 0.561(0.401,0.694)               | 0.77(0.49,1.21) |       | 0.583(0.422,0.714)    | 1.15(0.72,1.83) |       |
| Karnofsky Performance Status, %                                | ≥80                         | 176              | 0.758(0.687,0.815) | Reference       | 0.069        | 0.515(0.438,0.587)               | Reference       | 0.20  | 0.643(0.566,0.709)    | Reference       | 0.083 |
|                                                                | <80                         | 34               | 0.618(0.434,0.757) | 1.61(0.95,2.72) |              | 0.412(0.248,0.569)               | 1.34(0.85,2.11) |       | 0.500(0.324,0.653)    | 1.53(0.94,2.47) |       |
| HCT-Comorbidity Index                                          | 0-2                         | 125              | 0.790(0.707,0.852) | Reference       | <b>0.017</b> | 0.520(0.428,0.604)               | Reference       | 0.073 | 0.643(0.552,0.721)    | Reference       | 0.053 |
|                                                                | ≥3                          | 85               | 0.655(0.542,0.746) | 1.67(1.09,2.57) |              | 0.466(0.356,0.568)               | 1.38(0.97,1.98) |       | 0.584(0.471,0.681)    | 1.47(0.99,2.18) |       |
| Tacrolimus initial dosing method                               | Flat                        | 131              | 0.761(0.678,0.826) | Reference       | 0.69         | 0.506(0.417,0.589)               | Reference       | 0.71  | 0.669(0.581,0.743)    | Reference       | 0.22  |
|                                                                | Weight-based                | 79               | 0.692(0.577,0.782) | 1.09(0.70,1.70) |              | 0.485(0.370,0.591)               | 0.93(0.64,1.35) |       | 0.536(0.419,0.640)    | 1.28(0.86,1.91) |       |
| Tacrolimus at initial steady state, ng/mL                      | <10                         | 176              | 0.736(0.664,0.795) | Reference       | 0.71         | 0.496(0.419,0.567)               | Reference       | 0.91  | 0.638(0.562,0.705)    | Reference       | 0.097 |
|                                                                | ≥10                         | 34               | 0.733(0.549,0.851) | 1.11(0.63,1.95) |              | 0.512(0.330,0.668)               | 1.03(0.64,1.66) |       | 0.519(0.338,0.672)    | 1.51(0.92,2.47) |       |

| Supplemental Table 3. Univariate analysis of GvHD |                |    |                   |               |      |                    |               |      |                  |               |      |                  |               |      |
|---------------------------------------------------|----------------|----|-------------------|---------------|------|--------------------|---------------|------|------------------|---------------|------|------------------|---------------|------|
|                                                   |                | N  | Grade II-IV aGvHD |               |      | Grade III-IV aGvHD |               |      | Any cGvHD        |               |      | Extensive cGvHD  |               |      |
|                                                   |                |    | 100 days (95%CI)  | HR (95%CI)    | P    | 100 days (95%CI)   | HR (95%CI)    | P    | 1-Yr (95%CI)     | HR (95%CI)    | P    | 1 Yr (95%CI)     | HR (95%CI)    | P    |
| Age                                               | <60            | 14 | 0.472(0.388,0.55  | Reference     | 0.12 | 0.153(0.100,0.21   | Reference     | 0.79 | 0.418(0.336,0.49 | Reference     | 0.12 | 0.311(0.236,0.38 | Reference     | 0.22 |
|                                                   |                | 4  | 1)                |               |      | 7)                 |               |      | 9)               |               |      | 9)               |               |      |
|                                                   | ≥60            | 66 | 0.348(0.236,0.46  | 0.69(0.43,1.1 |      | 0.136(0.067,0.23   | 0.90(0.41,1.9 |      | 0.322(0.211,0.43 | 0.69(0.43,1.1 |      | 0.245(0.148,0.35 | 0.71(0.40,1.2 |      |
|                                                   |                |    | 4)                | 1)            |      | 1)                 | 6)            |      | 7)               | 2)            |      | 5)               | 5)            |      |
| Sex                                               | M              | 12 | 0.475(0.384,0.56  | Reference     | 0.21 | 0.164(0.104,0.23   | Reference     | 0.46 | 0.412(0.322,0.50 | Reference     | 0.69 | 0.276(0.199,0.35 | Reference     | 0.51 |
|                                                   |                | 2  | 1)                |               |      | 5)                 |               |      | 0)               |               |      | 9)               |               |      |
|                                                   | F              | 88 | 0.375(0.274,0.47  | 0.76(0.50,1.1 |      | 0.125(0.066,0.20   | 0.76(0.36,1.5 |      | 0.356(0.257,0.45 | 0.92(0.60,1.4 |      | 0.310(0.216,0.40 | 1.19(0.72,1.9 |      |
|                                                   |                |    | 5)                | 7)            |      | 4)                 | 8)            |      | 7)               | 3)            |      | 9)               | 5)            |      |
| Female donor to male recipient                    | No             | 17 | 0.443(0.369,0.51  | Reference     | 0.48 | 0.148(0.100,0.20   | Reference     | 0.95 | 0.354(0.283,0.42 | Reference     | 0.04 | 0.260(0.197,0.32 | Reference     | 0.05 |
|                                                   |                | 6  | 5)                |               |      | 4)                 |               |      | 5)               |               | 9    | 8)               |               | 2    |
|                                                   | Yes            | 34 | 0.382(0.220,0.54  | 0.81(0.46,1.4 |      | 0.147(0.053,0.28   | 0.97(0.38,2.4 |      | 0.559(0.372,0.71 | 1.67(1.01,2.7 |      | 0.441(0.268,0.60 | 1.79(1.01,3.1 |      |
|                                                   |                |    | 3)                | 5)            |      | 7)                 | 7)            |      | 0)               | 5)            |      | 1)               | 7)            |      |
| Disease Risk Index                                | Low            | 31 | 0.419(0.243,0.58  | Reference     | 0.44 | 0.097(0.024,0.23   | Reference     | 0.48 | 0.387(0.216,0.55 | Reference     | 0.94 | 0.226(0.097,0.38 | Reference     | 0.43 |
|                                                   |                |    | 6)                |               |      | 2)                 |               |      | 5)               |               |      | 6)               |               |      |
|                                                   | Intermediate   | 81 | 0.407(0.299,0.51  | 0.93(0.49,1.7 |      | 0.136(0.072,0.22   | 1.45(0.41,5.1 |      | 0.385(0.276,0.49 | 0.89(0.48,1.6 |      | 0.332(0.230,0.43 | 1.66(0.72,3.8 |      |
|                                                   |                |    | 2)                | 8)            |      | 0)                 | 0)            |      | 2)               | 5)            |      | 8)               | 3)            |      |
|                                                   | High/Very high | 78 | 0.500(0.384,0.60  | 1.25(0.67,2.3 |      | 0.179(0.103,0.27   | 1.98(0.58,6.7 |      | 0.388(0.279,0.49 | 0.90(0.48,1.6 |      | 0.271(0.177,0.37 | 1.35(0.58,3.1 |      |
|                                                   |                |    | 5)                | 6)            |      | 2)                 | 6)            |      | 6)               | 7)            |      | 5)               | 4)            |      |
| Conditioning regimen                              | MAC-TBI        | 71 | 0.493(0.371,0.60  | Reference     | 0.41 | 0.113(0.052,0.19   | Reference     | 0.23 | 0.484(0.359,0.59 | Reference     | 0.22 | 0.365(0.252,0.48 | Reference     | 0.24 |
|                                                   |                |    | 4)                |               |      | 9)                 |               |      | 7)               |               |      | 0)               |               |      |
|                                                   | MAC-Non-TBI    | 18 | 0.444(0.208,0.65  | 0.90(0.42,1.9 |      | 0.056(0.003,0.23   | 0.48(0.06,3.8 |      | 0.333(0.131,0.55 | 0.63(0.26,1.5 |      | 0.278(0.097,0.49 | 0.70(0.27,1.7 |      |
|                                                   |                |    | 8)                | 7)            |      | 1)                 | 8)            |      | 2)               | 2)            |      | 5)               | 9)            |      |
|                                                   | RIC/NMA        | 12 | 0.397(0.309,0.48  | 0.75(0.49,1.1 |      | 0.182(0.119,0.25   | 1.67(0.75,3.7 |      | 0.341(0.257,0.42 | 0.70(0.45,1.0 |      | 0.249(0.176,0.33 | 0.65(0.39,1.0 |      |
|                                                   |                |    | 1                 | 5)            |      | 6)                 | 4)            |      | 7)               | 8)            |      | 0)               | 8)            |      |
| Donor type                                        | Haploidentical | 17 | 0.401(0.327,0.47  | Reference     | 0.03 | 0.134(0.088,0.18   | Reference     | 0.21 | 0.375(0.302,0.44 | Reference     | 0.40 | 0.285(0.219,0.35 | Reference     | 0.69 |
|                                                   |                | 2  | 4)                |               | 6    | 9)                 |               |      | 8)               |               |      | 5)               |               |      |

| Supplemental Table 3. Univariate analysis of GvHD |                             |                   |                    |                 |              |                    |                 |      |                    |                 |              |                    |                 |       |
|---------------------------------------------------|-----------------------------|-------------------|--------------------|-----------------|--------------|--------------------|-----------------|------|--------------------|-----------------|--------------|--------------------|-----------------|-------|
|                                                   |                             | Grade II-IV aGvHD |                    |                 |              | Grade III-IV aGvHD |                 |      | Any cGvHD          |                 |              | Extensive cGvHD    |                 |       |
|                                                   |                             | N                 | 100 days (95%CI)   | HR (95%CI)      | P            | 100 days (95%CI)   | HR (95%CI)      | P    | 1-Yr (95%CI)       | HR (95%CI)      | P            | 1 Yr (95%CI)       | HR (95%CI)      | P     |
|                                                   | Mismatched unrelated        | 38                | 0.579(0.403,0.720) | 1.68(1.05,2.70) |              | 0.211(0.097,0.352) | 1.67(0.75,3.74) |      | 0.447(0.283,0.599) | 1.24(0.72,2.16) |              | 0.316(0.175,0.467) | 1.14(0.59,2.17) |       |
| ABO blood group compatibility                     | ABO Compatible              | 139               | 0.403(0.321,0.483) | Reference       | 0.66         | 0.151(0.097,0.216) | Reference       | 0.75 | 0.374(0.293,0.456) | Reference       | 0.88         | 0.301(0.225,0.379) | Reference       | 0.98  |
|                                                   | Minor                       | 32                | 0.469(0.287,0.631) | 1.24(0.70,2.19) |              | 0.094(0.023,0.225) | 0.59(0.18,1.91) |      | 0.438(0.260,0.602) | 1.23(0.70,2.18) |              | 0.250(0.116,0.410) | 0.89(0.44,1.82) |       |
|                                                   | Major                       | 24                | 0.500(0.284,0.682) | 1.34(0.72,2.48) |              | 0.167(0.050,0.341) | 1.15(0.39,3.44) |      | 0.391(0.191,0.587) | 1.04(0.56,1.96) |              | 0.304(0.130,0.500) | 0.98(0.45,2.14) |       |
|                                                   | Bidirectional               | 15                | 0.533(0.248,0.753) | 1.38(0.69,2.76) |              | 0.200(0.045,0.433) | 1.32(0.41,4.27) |      | 0.400(0.153,0.640) | 1.26(0.57,2.78) |              | 0.267(0.076,0.507) | 1.14(0.44,2.93) |       |
| Donor CMV serostatus                              | D+                          | 143               | 0.378(0.298,0.457) | Reference       | <b>0.010</b> | 0.133(0.083,0.194) | Reference       | 0.38 | 0.340(0.262,0.418) | Reference       | <b>0.036</b> | 0.254(0.186,0.329) | Reference       | 0.064 |
|                                                   | D-                          | 67                | 0.552(0.424,0.663) | 1.73(1.14,2.62) |              | 0.179(0.098,0.280) | 1.38(0.67,2.83) |      | 0.492(0.364,0.608) | 1.59(1.03,2.47) |              | 0.367(0.251,0.484) | 1.61(0.97,2.67) |       |
| Recipient CMV serostatus                          | R+                          | 177               | 0.435(0.361,0.507) | Reference       | 0.87         | 0.158(0.109,0.216) | Reference       | 0.36 | 0.372(0.300,0.443) | Reference       | 0.43         | 0.280(0.215,0.348) | Reference       | 0.58  |
|                                                   | R-                          | 33                | 0.424(0.252,0.586) | 1.05(0.58,1.90) |              | 0.091(0.023,0.219) | 0.58(0.17,1.98) |      | 0.477(0.290,0.643) | 1.24(0.71,2.14) |              | 0.347(0.185,0.515) | 1.19(0.63,2.25) |       |
| Graft source                                      | Peripheral blood stem cells | 166               | 0.470(0.392,0.544) | Reference       | <b>0.027</b> | 0.169(0.116,0.230) | Reference       | 0.09 | 0.430(0.353,0.505) | Reference       | <b>0.032</b> | 0.319(0.248,0.391) | Reference       | 0.082 |
|                                                   | Bone marrow                 | 44                | 0.295(0.168,0.434) | 0.53(0.30,0.93) |              | 0.068(0.017,0.169) | 0.38(0.12,1.22) |      | 0.228(0.117,0.362) | 0.51(0.26,1.00) |              | 0.183(0.084,0.311) | 0.53(0.24,1.13) |       |
| Karnofsky Performance Status, %                   | ≥80                         | 176               | 0.432(0.358,0.504) | Reference       | 0.78         | 0.136(0.090,0.192) | Reference       | 0.30 | 0.413(0.338,0.486) | Reference       | 0.42         | 0.313(0.245,0.383) | Reference       | 0.36  |
|                                                   | <80                         | 34                | 0.441(0.269,0.600) | 1.08(0.61,1.91) |              | 0.206(0.089,0.356) | 1.56(0.68,3.58) |      | 0.265(0.129,0.422) | 0.79(0.43,1.46) |              | 0.176(0.070,0.322) | 0.72(0.34,1.52) |       |

| Supplemental Table 3. Univariate analysis of GvHD |              |    |                   |               |      |                    |               |      |                  |               |      |                  |               |      |
|---------------------------------------------------|--------------|----|-------------------|---------------|------|--------------------|---------------|------|------------------|---------------|------|------------------|---------------|------|
|                                                   |              | N  | Grade II-IV aGvHD |               |      | Grade III-IV aGvHD |               |      | Any cGvHD        |               |      | Extensive cGvHD  |               |      |
|                                                   |              |    | 100 days (95%CI)  | HR (95%CI)    | P    | 100 days (95%CI)   | HR (95%CI)    | P    | 1-Yr (95%CI)     | HR (95%CI)    | P    | 1 Yr (95%CI)     | HR (95%CI)    | P    |
| <b>HCT-Comorbidity Index</b>                      | 0-2          | 12 | 0.440(0.351,0.52  | Reference     | 0.80 | 0.128(0.076,0.19   | Reference     | 0.32 | 0.425(0.336,0.51 | Reference     | 0.31 | 0.301(0.222,0.38 | Reference     | 0.85 |
|                                                   |              | 5  | 5)                |               |      | 3)                 |               |      | 1)               |               |      | 4)               |               |      |
|                                                   | ≥3           | 85 | 0.424(0.317,0.52  | 0.95(0.63,1.4 |      | 0.176(0.104,0.26   | 1.42(0.71,2.8 |      | 0.334(0.234,0.43 | 0.79(0.51,1.2 |      | 0.273(0.182,0.37 | 0.95(0.58,1.5 |      |
|                                                   |              |    | 6)                | 4)            |      | 5)                 | 7)            |      | 6)               | 2)            |      | 2)               | 7)            |      |
| <b>Tacrolimus initial dosing method</b>           | Flat         | 13 | 0.458(0.371,0.54  | Reference     | 0.39 | 0.160(0.103,0.22   | Reference     | 0.48 | 0.432(0.345,0.51 | Reference     | 0.06 | 0.316(0.237,0.39 | Reference     | 0.30 |
|                                                   |              | 1  | 1)                |               |      | 8)                 |               |      | 6)               |               | 3    | 7)               |               |      |
|                                                   | Weight-based | 79 | 0.392(0.284,0.49  | 0.83(0.54,1.2 |      | 0.127(0.065,0.21   | 0.76(0.36,1.6 |      | 0.313(0.212,0.41 | 0.64(0.40,1.0 |      | 0.247(0.156,0.34 | 0.76(0.45,1.2 |      |
|                                                   |              |    | 9)                | 8)            |      | 0)                 | 1)            |      | 9)               | 3)            |      | 8)               | 8)            |      |
| <b>Tacrolimus at initial steady state, ng/mL</b>  | <10          | 17 | 0.455(0.380,0.52  | Reference     | 0.16 | 0.159(0.109,0.21   | Reference     | 0.29 | 0.402(0.329,0.47 | Reference     | 0.21 | 0.287(0.221,0.35 | Reference     | 0.93 |
|                                                   |              | 6  | 6)                |               |      | 7)                 |               |      | 4)               |               | 5)   |                  |               |      |
|                                                   | ≥10          | 34 | 0.324(0.174,0.48  | 0.65(0.35,1.2 |      | 0.088(0.022,0.21   | 0.54(0.16,1.7 |      | 0.311(0.158,0.47 | 0.66(0.34,1.2 |      | 0.311(0.158,0.47 | 1.02(0.52,2.0 |      |
|                                                   |              |    | 3)                | 1)            |      | 3)                 | 7)            |      | 7)               | 8)            |      | 7)               | 1)            |      |

| <b>Supplemental Table 4. Univariate Analysis of Infection</b> |                      |          |                               |                   |          |                         |                   |              |                         |                   |              |
|---------------------------------------------------------------|----------------------|----------|-------------------------------|-------------------|----------|-------------------------|-------------------|--------------|-------------------------|-------------------|--------------|
|                                                               |                      |          | <b>Blood Stream Infection</b> |                   |          | <b>Fungal Infection</b> |                   |              | <b>Viral Infection*</b> |                   |              |
|                                                               |                      | <b>N</b> | <b>100 days (95%CI)</b>       | <b>HR (95%CI)</b> | <b>P</b> | <b>100 days (95%CI)</b> | <b>HR (95%CI)</b> | <b>P</b>     | <b>100 days (95%CI)</b> | <b>HR (95%CI)</b> | <b>P</b>     |
| <b>Age</b>                                                    | <60                  | 144      | 0.278(0.207,0.353)            | Reference         | 0.18     | 0.042(0.017,0.084)      | Reference         | <b>0.005</b> | 0.833(0.761,0.886)      | Reference         | <b>0.029</b> |
|                                                               | ≥60                  | 66       | 0.379(0.262,0.495)            | 1.40(0.86,2.29)   |          | 0.154(0.078,0.252)      | 3.90(1.43,10.65)  |              | 0.712(0.584,0.807)      | 0.68(0.49,0.95)   |              |
| <b>Sex</b>                                                    | M                    | 122      | 0.311(0.231,0.395)            | Reference         | 0.93     | 0.041(0.015,0.088)      | Reference         | <b>0.024</b> | 0.820(0.738,0.878)      | Reference         | 0.23         |
|                                                               | F                    | 88       | 0.307(0.214,0.405)            | 0.98(0.60,1.59)   |          | 0.125(0.066,0.204)      | 3.19(1.12,9.08)   |              | 0.761(0.656,0.838)      | 0.83(0.61,1.13)   |              |
| <b>Female donor to male recipient</b>                         | No                   | 176      | 0.301(0.235,0.370)            | Reference         | 0.64     | 0.074(0.042,0.119)      | Reference         | 0.79         | 0.795(0.727,0.848)      | Reference         | 0.50         |
|                                                               | Yes                  | 34       | 0.353(0.197,0.513)            | 1.16(0.63,2.11)   |          | 0.088(0.022,0.213)      | 1.19(0.34,4.12)   |              | 0.794(0.606,0.899)      | 0.87(0.60,1.26)   |              |
| <b>Disease Risk Index</b>                                     | Low                  | 31       | 0.226(0.098,0.386)            | Reference         | 0.44     | 0.032(0.002,0.144)      | Reference         | 0.60         | 0.774(0.573,0.889)      | Reference         | 0.079        |
|                                                               | Intermediate         | 81       | 0.309(0.211,0.411)            | 1.43(0.62,3.32)   |          | 0.074(0.030,0.145)      | 2.35(0.28,19.83)  |              | 0.716(0.602,0.802)      | 0.89(0.56,1.41)   |              |
|                                                               | High/Very high       | 78       | 0.359(0.254,0.465)            | 1.69(0.74,3.86)   |          | 0.091(0.040,0.168)      | 2.82(0.34,23.09)  |              | 0.846(0.742,0.911)      | 1.31(0.84,2.07)   |              |
| <b>Conditioning regimen</b>                                   | MAC-TBI              | 71       | 0.282(0.182,0.390)            | Reference         | 0.81     | 0.056(0.018,0.127)      | Reference         | 0.63         | 0.845(0.734,0.912)      | Reference         | <b>0.007</b> |
|                                                               | MAC-Non- TBI         | 18       | 0.333(0.131,0.552)            | 1.27(0.50,3.22)   |          | 0.056(0.003,0.231)      | 0.97(0.11,8.39)   |              | 0.944(0.485,0.995)      | 2.27(1.20,4.29)   |              |
|                                                               | RIC/NMA              | 121      | 0.322(0.241,0.406)            | 1.16(0.68,1.98)   |          | 0.092(0.048,0.152)      | 1.67(0.53,5.19)   |              | 0.744(0.655,0.813)      | 0.74(0.54,1.01)   |              |
| <b>Donor type</b>                                             | Haploidentical       | 172      | 0.308(0.241,0.378)            | Reference         | 0.96     | 0.088(0.051,0.136)      | Reference         | 0.19         | 0.820(0.753,0.870)      | Reference         | <b>0.013</b> |
|                                                               | Mismatched unrelated | 38       | 0.316(0.175,0.466)            | 1.02(0.55,1.88)   |          | 0.026(0.002,0.120)      | 0.29(0.04,2.12)   |              | 0.684(0.506,0.810)      | 0.58(0.40,0.85)   |              |
| <b>ABO blood group compatibility</b>                          | ABO Compatible       | 139      | 0.302(0.228,0.380)            | Reference         | 0.64     | 0.072(0.037,0.124)      | Reference         | 0.75         | 0.806(0.729,0.863)      | Reference         | 0.46         |
|                                                               | Minor                | 32       | 0.250(0.116,0.410)            | 0.80(0.38,1.68)   |          | 0.094(0.023,0.225)      | 1.30(0.36,4.68)   |              | 0.719(0.521,0.846)      | 0.81(0.52,1.25)   |              |
|                                                               | Major                | 24       | 0.375(0.186,0.565)            | 1.36(0.65,2.83)   |          | 0.042(0.003,0.180)      | 0.57(0.07,4.53)   |              | 0.792(0.552,0.912)      | 1.15(0.68,1.94)   |              |
|                                                               | Bidirectional        | 15       | 0.400(0.156,0.636)            | 1.35(0.60,3.02)   |          | 0.133(0.020,0.355)      | 1.87(0.42,8.32)   |              | 0.867(0.474,0.973)      | 1.33(0.74,2.41)   |              |
| <b>Donor CMV serostatus</b>                                   | D+                   | 143      | 0.322(0.247,0.399)            | Reference         | 0.55     | 0.106(0.062,0.163)      | Reference         | <b>0.021</b> | 0.839(0.767,0.891)      | Reference         | <b>0.003</b> |
|                                                               | D-                   | 67       | 0.284(0.181,0.395)            | 0.85(0.50,1.44)   |          | 0.015(0.001,0.072)      | 0.13(0.02,1.00)   |              | 0.701(0.574,0.797)      | 0.59(0.43,0.82)   |              |



| Supplemental Table 4. Univariate Analysis of Infection |                             |                        |                    |                 |              |                    |                  |              |                    |                 |              |
|--------------------------------------------------------|-----------------------------|------------------------|--------------------|-----------------|--------------|--------------------|------------------|--------------|--------------------|-----------------|--------------|
|                                                        |                             | Blood Stream Infection |                    |                 |              | Fungal Infection   |                  |              | Viral Infection*   |                 |              |
|                                                        |                             | N                      | 100 days (95%CI)   | HR (95%CI)      | P            | 100 days (95%CI)   | HR (95%CI)       | P            | 100 days (95%CI)   | HR (95%CI)      | P            |
| Recipient CMV serostatus                               | R+                          | 177                    | 0.305(0.239,0.374) | Reference       | 0.68         | 0.085(0.050,0.132) | Reference        | 0.27         | 0.853(0.791,0.898) | Reference       | <0.001       |
|                                                        | R-                          | 33                     | 0.333(0.179,0.495) | 1.15(0.60,2.20) |              | 0.030(0.002,0.136) | 0.34(0.05,2.54)  |              | 0.485(0.304,0.644) | 0.42(0.23,0.77) |              |
| Graft source                                           | Peripheral blood stem cells | 166                    | 0.301(0.233,0.372) | Reference       | 0.55         | 0.079(0.044,0.126) | Reference        | 0.82         | 0.783(0.712,0.839) | Reference       | 0.13         |
|                                                        | Bone marrow                 | 44                     | 0.341(0.205,0.482) | 1.19(0.67,2.13) |              | 0.068(0.017,0.169) | 0.87(0.25,3.03)  |              | 0.841(0.687,0.923) | 1.30(0.89,1.90) |              |
| Karnofsky Performance Status, %                        | ≥80                         | 176                    | 0.273(0.209,0.340) | Reference       | <b>0.004</b> | 0.051(0.025,0.091) | Reference        | <b>0.002</b> | 0.767(0.697,0.823) | Reference       | <b>0.009</b> |
|                                                        | <80                         | 34                     | 0.500(0.320,0.656) | 2.27(1.30,3.98) |              | 0.206(0.089,0.356) | 4.24(1.60,11.25) |              | 0.941(0.744,0.988) | 1.60(1.13,2.26) |              |
| HCT-Comorbidity Index                                  | 0-2                         | 125                    | 0.248(0.176,0.327) | Reference       | <b>0.014</b> | 0.073(0.036,0.127) | Reference        | 0.82         | 0.792(0.709,0.854) | Reference       | 0.94         |
|                                                        | ≥3                          | 85                     | 0.400(0.295,0.502) | 1.83(1.13,2.97) |              | 0.082(0.036,0.153) | 1.12(0.42,3.00)  |              | 0.800(0.696,0.872) | 1.01(0.75,1.37) |              |
| Tacrolimus initial dosing method                       | Flat                        | 131                    | 0.298(0.222,0.377) | Reference       | 0.72         | 0.069(0.034,0.122) | Reference        | 0.62         | 0.779(0.696,0.841) | Reference       | 0.33         |
|                                                        | Weight-based                | 79                     | 0.329(0.228,0.434) | 1.10(0.67,1.78) |              | 0.089(0.039,0.164) | 1.28(0.48,3.42)  |              | 0.823(0.717,0.892) | 1.16(0.85,1.58) |              |
| Tacrolimus at initial steady state, ng/mL              | <10                         | 176                    | 0.307(0.240,0.376) | Reference       | 0.91         | 0.062(0.033,0.105) | Reference        | 0.077        | 0.773(0.703,0.828) | Reference       | <b>0.003</b> |
|                                                        | ≥10                         | 34                     | 0.324(0.174,0.483) | 1.04(0.55,1.95) |              | 0.152(0.054,0.295) | 2.54(0.89,7.25)  |              | 0.912(0.727,0.974) | 1.67(1.13,2.45) |              |

\*Earliest viral infection of CMV, ADV, HHV6, BKV, or EBV

| Supplemental Table 5. Univariate and Multivariable Analyses of CMV and BKV Infection |                      |            |                    |                 |       |                 |              |                    |                 |      |                 |                |  |
|--------------------------------------------------------------------------------------|----------------------|------------|--------------------|-----------------|-------|-----------------|--------------|--------------------|-----------------|------|-----------------|----------------|--|
|                                                                                      |                      | CMV        |                    |                 |       |                 |              | BKV                |                 |      |                 |                |  |
|                                                                                      |                      | Univariate |                    |                 |       | Multivariable*  |              | Univariate         |                 |      |                 | Multivariable† |  |
|                                                                                      |                      | N          | 100 days (95%CI)   | HR (95%CI)      | P     | HR (95%CI)      | P            | 100 days (95%CI)   | HR (95%CI)      | P    | HR (95%CI)      | P              |  |
| Age                                                                                  | <60                  | 144        | 0.611(0.526,0.686) | Reference       | 0.82  | Reference       | 0.20         | 0.271(0.201,0.345) | Reference       | 0.53 | Reference       | 0.68           |  |
|                                                                                      | ≥60                  | 66         | 0.652(0.521,0.754) | 0.96(0.68,1.35) |       | 0.79(0.55,1.13) |              | 0.227(0.135,0.335) | 0.83(0.46,1.50) |      | 0.88(0.48,1.62) |                |  |
| Sex                                                                                  | M                    | 122        | 0.664(0.572,0.741) | Reference       | 0.19  | Reference       | <b>0.014</b> | 0.262(0.188,0.343) | Reference       | 0.81 | Reference       | 0.74           |  |
|                                                                                      | F                    | 88         | 0.568(0.457,0.665) | 0.79(0.56,1.12) |       | 0.63(0.44,0.91) |              | 0.250(0.165,0.344) | 0.93(0.55,1.60) |      | 0.91(0.53,1.57) |                |  |
| Female donor to male recipient                                                       | No                   | 176        | 0.631(0.554,0.698) | Reference       | 0.31  | Reference       | <b>0.030</b> | 0.244(0.183,0.310) | Reference       | 0.39 | Reference       | 0.27           |  |
|                                                                                      | Yes                  | 34         | 0.588(0.401,0.735) | 0.79(0.51,1.21) |       | 0.56(0.33,0.94) |              | 0.324(0.174,0.483) | 1.33(0.70,2.53) |      | 1.45(0.75,2.78) |                |  |
| Disease Risk Index                                                                   | Low                  | 31         | 0.677(0.476,0.815) | Reference       | 0.27  | Reference       | 0.47         | 0.323(0.167,0.490) | Reference       | 0.44 | Reference       | 0.43           |  |
|                                                                                      | Intermediate         | 81         | 0.580(0.464,0.680) | 0.79(0.50,1.28) |       | 0.82(0.50,1.35) |              | 0.210(0.129,0.305) | 0.60(0.27,1.32) |      | 0.59(0.27,1.32) |                |  |
|                                                                                      | High/Very high       | 78         | 0.654(0.536,0.749) | 1.09(0.67,1.77) |       | 1.04(0.62,1.74) |              | 0.256(0.165,0.357) | 0.73(0.34,1.55) |      | 0.78(0.36,1.66) |                |  |
| Conditioning regimen                                                                 | MAC-TBI              | 71         | 0.620(0.495,0.722) | Reference       | 0.69  | Reference       | 0.20         | 0.239(0.147,0.344) | Reference       | 0.31 | Reference       | 0.66           |  |
|                                                                                      | MAC-Non-TBI          | 18         | 0.556(0.293,0.754) | 0.77(0.38,1.54) |       | 0.65(0.32,1.31) |              | 0.389(0.168,0.606) | 1.95(0.78,4.84) |      | 1.52(0.49,4.75) |                |  |
|                                                                                      | RIC                  | 121        | 0.636(0.543,0.716) | 0.89(0.61,1.30) |       | 0.72(0.49,1.05) |              | 0.248(0.175,0.328) | 1.05(0.58,1.88) |      | 0.97(0.52,1.80) |                |  |
| Donor type                                                                           | Haploidentical       | 172        | 0.651(0.574,0.718) | Reference       | 0.054 | Reference       | 0.28         | 0.273(0.209,0.341) | Reference       | 0.20 | Reference       | 0.27           |  |
|                                                                                      | Mismatched unrelated | 38         | 0.500(0.330,0.648) | 0.63(0.40,1.00) |       | 0.77(0.48,1.24) |              | 0.184(0.080,0.322) | 0.60(0.28,1.29) |      | 0.65(0.30,1.40) |                |  |
| ABO blood group compatibility                                                        | ABO Compatible       | 139        | 0.633(0.547,0.708) | Reference       | 0.41  | Reference       | 0.72         | 0.259(0.189,0.334) | Reference       | 1.00 | Reference       | 1.00           |  |
|                                                                                      | Minor                | 32         | 0.500(0.315,0.660) | 0.69(0.41,1.17) |       | 0.74(0.44,1.24) |              | 0.250(0.116,0.410) | 0.93(0.44,1.96) |      | 0.93(0.44,1.98) |                |  |
|                                                                                      | Major                | 24         | 0.667(0.432,0.822) | 1.10(0.65,1.86) |       | 1.03(0.57,1.86) |              | 0.250(0.099,0.436) | 0.98(0.41,2.34) |      | 1.07(0.43,2.69) |                |  |
|                                                                                      | Bidirectional        | 15         | 0.733(0.402,0.900) | 1.24(0.68,2.26) |       | 0.97(0.53,1.77) |              | 0.267(0.077,0.506) | 0.98(0.37,2.61) |      | 1.02(0.37,2.78) |                |  |

| Supplemental Table 5. Univariate and Multivariable Analyses of CMV and BKV Infection |                             |     |                    |                 |        |                 |        |                    |                 |       |                 |       |
|--------------------------------------------------------------------------------------|-----------------------------|-----|--------------------|-----------------|--------|-----------------|--------|--------------------|-----------------|-------|-----------------|-------|
|                                                                                      |                             |     | CMV                |                 |        |                 |        | BKV                |                 |       |                 |       |
|                                                                                      |                             |     | Univariate         |                 |        | Multivariable*  |        | Univariate         |                 |       | Multivariable†  |       |
|                                                                                      |                             | N   | 100 days (95%CI)   | HR (95%CI)      | P      | HR (95%CI)      | P      | 100 days (95%CI)   | HR (95%CI)      | P     | HR (95%CI)      | P     |
| Donor CMV serostatus                                                                 | D+                          | 143 | 0.699(0.616,0.768) | Reference       | <0.001 | Reference       | 0.055  | 0.266(0.196,0.340) | Reference       | 0.52  | Reference       | 0.61  |
|                                                                                      | D-                          | 67  | 0.463(0.339,0.577) | 0.51(0.34,0.75) |        | 2.86(0.98,8.37) |        | 0.239(0.144,0.347) | 0.83(0.47,1.46) |       | 0.86(0.49,1.52) |       |
| Recipient CMV serostatus                                                             | R+                          | 177 | 0.723(0.650,0.783) | Reference       | <0.001 | Reference       | <0.001 | 0.249(0.187,0.314) | Reference       | 0.43  | Reference       | 0.65  |
|                                                                                      | R-                          | 33  | 0.091(0.023,0.219) | 0.07(0.02,0.22) |        | 0.08(0.03,0.24) |        | 0.303(0.156,0.464) | 1.32(0.66,2.67) |       | 1.19(0.56,2.52) |       |
| Graft source                                                                         | Peripheral blood stem cells | 166 | 0.627(0.548,0.695) | Reference       | 0.51   | Reference       | 0.13   | 0.235(0.173,0.302) | Reference       | 0.14  | Reference       | 0.13  |
|                                                                                      | Bone marrow                 | 44  | 0.614(0.451,0.741) | 0.87(0.59,1.29) |        | 0.72(0.48,1.10) |        | 0.341(0.205,0.482) | 1.57(0.87,2.85) |       | 1.57(0.87,2.85) |       |
| Karnofsky Performance Status, %                                                      | ≥80                         | 176 | 0.591(0.514,0.660) | Reference       | 0.015  | Reference       | 0.030  | 0.261(0.199,0.328) | Reference       | 0.78  | Reference       | 0.82  |
|                                                                                      | <80                         | 34  | 0.794(0.606,0.899) | 1.67(1.11,2.51) |        | 1.53(1.04,2.25) |        | 0.235(0.109,0.389) | 0.90(0.42,1.91) |       | 0.92(0.43,1.95) |       |
| HCT-Comorbidity Index                                                                | 0-2                         | 125 | 0.648(0.557,0.725) | Reference       | 0.75   | Reference       | 0.77   | 0.232(0.162,0.309) | Reference       | 0.35  | Reference       | 0.29  |
|                                                                                      | ≥3                          | 85  | 0.588(0.475,0.685) | 0.95(0.66,1.35) |        | 0.95(0.66,1.37) |        | 0.294(0.201,0.393) | 1.29(0.76,2.19) |       | 1.33(0.78,2.25) |       |
| Letemovir                                                                            | No                          | 193 | 0.658(0.586,0.721) | Reference       | 0.002  | Reference       | 0.019  | 0.259(0.199,0.323) | Reference       | 0.84  | Reference       | 0.95  |
|                                                                                      | Yes                         | 17  | 0.235(0.069,0.457) | 0.25(0.09,0.68) |        | 0.29(0.10,0.82) |        | 0.235(0.069,0.457) | 0.90(0.33,2.49) |       | 0.97(0.35,2.70) |       |
| Tacrolimus initial dosing method                                                     | Flat                        | 131 | 0.611(0.521,0.689) | Reference       | 0.77   | Reference       | 0.23   | 0.214(0.148,0.288) | Reference       | 0.063 | Reference       | 0.087 |
|                                                                                      | Weight-based                | 79  | 0.646(0.528,0.741) | 1.05(0.75,1.48) |        | 1.24(0.87,1.78) |        | 0.329(0.228,0.434) | 1.65(0.97,2.81) |       | 1.60(0.94,2.72) |       |
| Tacrolimus at initial steady state, ng/mL                                            | <10                         | 176 | 0.614(0.537,0.681) | Reference       | 0.40   | Reference       | 0.72   | 0.239(0.178,0.304) | Reference       | 0.13  | Reference       | 0.36  |
|                                                                                      | ≥10                         | 34  | 0.676(0.486,0.809) | 1.21(0.77,1.89) |        | 1.09(0.68,1.75) |        | 0.353(0.197,0.513) | 1.66(0.86,3.19) |       | 1.44(0.66,3.14) |       |

\*Adjusted for Sex, Female donor to male recipient, Karnofsky Performance Status, Donor/Recipient CMV serostatus, and letemovir prophylaxis.

†Adjusted for Graft source.
